# Supplementary material for: Assessment of a New Copper-Based Formulation to Control Esca Disease in Field and Study of Its Impact on the Vine Microbiome, Vine Physiology and Enological Parameters of the Juice
Source: MDPI journal article supplement (doi:10.3390/jof8020151), 2022-01-31
Supplement: s1 [file s1]

## SUPPLEMENTARY Tables

**Supplementary Table S1.** List of the genes targeted in the transcriptomic study.

| Function                   | Gene                                                                         | Primer Sequences                                                 | GenBank or TC TIGR* Accession Number |
|----------------------------|------------------------------------------------------------------------------|------------------------------------------------------------------|--------------------------------------|
| Reference genes            | <i>EF1</i> (EF1- $\alpha$ elongation factor)                                 | 5'-GAACTGGGTGCTTGATAGGC-3'<br>5'-AACCAAAATATCCGGAGTAAAAGA-3'     | GU585871                             |
|                            | <i>60SRP</i> (60S ribosomal protein L18)                                     | 5'-ATCTACCTCAAGCTCTAGTC-3'<br>5'-CAATCTTGTCTCCTTCT-3'            | XM_002270599                         |
|                            | <i>39SRP</i> (39S ribosomal protein L41)                                     | 5'-AACCAAAATATCCGGAGTAAAAGA-3'<br>5'-GACTGACTTCAAGCTTAAACC-3'    | XM_002285709                         |
| Phenylpropanoid metabolism | <i>PAL</i> (Phenylalanine ammonia lyase)                                     | 5'-TCCTCCCGAAAAACAGCTG-3'<br>5'-TCCTCCAAATGCCTCAAATCA-3'         | X75967                               |
|                            | <i>STS</i> (Stilbene synthase)                                               | 5'-AGGAAGCAGCATTGAAGGCTC-3'<br>5'-TGCACCAAGCATTCTACACC-3'        | FJ851185                             |
| Defense protein            | <i>CHIT4C</i> (Chitinase class V)                                            | 5'-TCGAATGGGATGGTGAAA -3'<br>5'-TCCCTGTGGAACACCAAG -3'           | NM_001281244                         |
|                            | <i>GLUC</i> ( $\beta$ -1,3 glucanase)                                        | 5'-TCAATGGCTGCAATGGTGC-3'<br>5'-CGGTCGATGTTGCGAGATTTA-3'         | DQ267748                             |
|                            | <i>PR1</i> (pathogenesis-related protein 1)                                  | 5'- GGAGTCCATTAGCACTCCTTG -3'<br>5'- CATAATTCTGGGCGTAGGCAG -3'   | XM_002273752                         |
|                            | <i>PR10</i> (pathogenesis-related protein 10)                                | 5'- CGTTAAGGGCGGCAAGAG -3'<br>5'- GCATCAGGGTGTGCCAAGA -3'        | DQ396809                             |
|                            | <i>GST1</i> (Glutathione s-transferase 1)                                    | 5'- TGCATGGAGGAGGAGTTCGT -3'<br>5'- CAAGGCTATATCCCCATTTTCTTC -3' | NM_001281248                         |
| Photosynthesis             | <i>PsbP1</i> (oxygen-evolving enhancer <i>PsbP</i> subunit of photosystem I) | 5'-TGTCGCCAGCCTGTACCTTG-3'<br>5'-GCTGACGGAGATGAAGGTGG-3'         | XM_002283012.4                       |
|                            | <i>Rbcl</i> ( <i>RuBisCo</i> large sub-unit)                                 | 5'-AATTTTCTCCACGGCGATA -3'<br>5'-ATCTGCGCCCGCCTTTATA -3'         | TC57584                              |
| Arsenite recovery genes    | <i>MSR</i> (Peptide methionine sulfoxide reductase))                         | 5'-GCATTTGGGCGTGTAGATGG-3'<br>5'-GCTTCAGTGTGGCCTGTTCT -3'        | XM_010662104.2                       |
|                            | <i>WRKY</i> (transcription factors)                                          | 5'-GGGCAGAAAGACATTCTTGA -3'<br>5'-AGGGATCTTCATCCGAACGC -3'       | XM_002272684.3                       |
|                            | <i>HYD2</i> ( <i>ABA</i> 8' hydroxylase 2)                                   | 5'-GAAGCTTGTCTCCGAGCCT -3'<br>5'-TATTGATCGACCGGCTTCC -3'         | NM_001281052.1                       |

\* see <http://www.jcvi.org/cms/research/projects/tdb/overview/>

**Supplementary Table S2: Identified asymptomatic Leaves metabolites from treated and non-treated vines (DAT-1a) versus (DS-1a).** From 16 significant  $m/z$  ( $P$ : ANOVA  $p$  value) discriminating the two conditions DAT and DS asymptomatic leaves (see Volcano in Figure 13A) the 5 annotated metabolites are ranked according to the normalized amount difference between DAT-DS (Diff). Negative or positive differences means that the metabolites are either more accumulated in DS or in DAT, respectively. Annotations names were obtained from Masstrix queries on *Vitis vinifera* database (with 1 ppm error), which assigned theoretical masses (ion and neutral) associated to the corresponding raw formula and predicted structure (MSCC).

| ID   | $P$      | Diff  | Th Mass<br>(Ion) | Structure | Formula                                           | Th Mass<br>(Neutral) | Error<br>(ppm) | Names                                                                                                                                                       |
|------|----------|-------|------------------|-----------|---------------------------------------------------|----------------------|----------------|-------------------------------------------------------------------------------------------------------------------------------------------------------------|
| 1581 | 0.000272 | -4.60 | 338.088130       | Ph        | C <sub>15</sub> H <sub>17</sub> NO <sub>8</sub>   | 339.095420           | 0.441          | 6-Hydroxy-5-methoxyindole glucuronide (see KEGG C03033); (2S,3S,4S,5R,6S)-3,4,5-trihydroxy-6-[(5-methoxy-1H-indol-6-yl)oxy]oxane-2-carboxylic acid [acetal] |
| 3316 | 0.004486 | -4.16 | 413.218150       | Lp        | C <sub>21</sub> H <sub>34</sub> O <sub>8</sub>    | 414.225589           | 0,535          | methyl 5-hydroperoxy-6,8,9,11-bisepidioxy-12,14-eicosadienoate [Hydroperoxy fatty acids [FA0104]]                                                           |
| 3963 | 0.002901 | -3.60 | 437.436393       | Lp        | C <sub>29</sub> H <sub>58</sub> O <sub>2</sub>    | 438.443680           | -0,001         | Nonacosanoic acid; nonacosanoic acid [carboxylic acid]                                                                                                      |
| 189  | 0.000046 | -1.18 | 219.051039       | NM        | C <sub>8</sub> H <sub>12</sub> O <sub>7</sub>     | 220.058305           | 0,012          | (R)-(Homo) 2-citrate; 1-Hydroxypentane-1,2,5-tricarboxylate; (-) threo-iso(homo) 2 citrate; 3-Hydroxy-3-carboxymethyl-adipic acid                           |
| 2193 | 0.000682 | +0.95 | 365.064435       | NM        | C <sub>13</sub> H <sub>19</sub> O <sub>10</sub> P | 366.071588           | 0,013          | Salicin 6-phosphate; Salicin-6P                                                                                                                             |

**Supplementary Table S3 : Identified Canes metabolites from treated and non-treated vines (DAT-c) versus (DS-c).** From 113 significant *m/z* (*P*: ANOVA *p* value) discriminating the two conditions DAT and DS canes (*see* Volcano in Figure 13B) the 32 annotated metabolites are ranked according to the normalized amount difference between DAT-DS (Diff). Negative or positive differences means that the metabolites are either more accumulated in DS or in DAT, respectively. Annotations names were obtained from Masstrix queries on *Vitis vinifera* database (with 1 ppm error), which assigned theoretical masses (ion and neutral) associated to the corresponding raw formula and predicted structure (MSCC).

| ID   | <i>P</i> | Diff  | Th Mass<br>(Ion) | Structure | Formula                                                           | Th Mass<br>(Neutral) | Error<br>(ppm) | Names                                                                                                                                                                                                                                |
|------|----------|-------|------------------|-----------|-------------------------------------------------------------------|----------------------|----------------|--------------------------------------------------------------------------------------------------------------------------------------------------------------------------------------------------------------------------------------|
| 1913 | 0.010626 | -4.21 | 353.103146       | Ph        | C <sub>20</sub> H <sub>18</sub> O <sub>6</sub>                    | 354.110340           | 0.006          | Cyclokievitone                                                                                                                                                                                                                       |
| 212  | 0.009158 | -3.62 | 223.13398        | Lp        | C <sub>13</sub> H <sub>20</sub> O <sub>3</sub>                    | 224.141245           | 0.004          | Vomifolioside; (6S,9R)-6-hydroxy-3-oxo- $\beta$ -ionol                                                                                                                                                                               |
| 9268 | 0.007012 | -3.55 | 629.172184       | Ph        | C <sub>27</sub> H <sub>34</sub> O <sub>17</sub>                   | 630.179591           | -0.012         | Leucodelphinidin 3-O-( $\beta$ -D-glucopyranosyl-(1 $\rightarrow$ 4)- $\beta$ -L-rhamnopyranoside) [Flavans, Flavanols and Leucoanthocyanidins [PK1202]]                                                                             |
| 4910 | 1.18E-07 | -3.40 | 471.384416       | Lp        | C <sub>31</sub> H <sub>52</sub> O <sub>3</sub>                    | 472.391645           | -0.000         | Soyasapogenol D                                                                                                                                                                                                                      |
| 9149 | 0.027266 | -3.39 | 623.161585       | Ph        | C <sub>28</sub> H <sub>32</sub> O <sub>16</sub>                   | 624.168680           | -0.568         | Tectorigenin 7-O-gentiobioside [Isoflavonoids [PK1205]]                                                                                                                                                                              |
| 8162 | 0.041731 | -2.93 | 575.452665       | Lp        | C <sub>32</sub> H <sub>64</sub> O <sub>8</sub>                    | 576.460120           | 0.002          | 1-(O- $\beta$ -D-glucopyranosyl)-(1,3R,25R)-hexacosanetriol [Fatty acyl glycosides of mono- and disaccharides [FA1301]]                                                                                                              |
| 8734 | 0.015264 | -2.76 | 603.484088       | Lp        | C <sub>34</sub> H <sub>68</sub> O <sub>8</sub>                    | 604.491420           | 0.002          | 1-(O- $\beta$ -D-glucopyranosyl)-(1,3R,27R)-octacosanetriol [Fatty acyl glycosides of mono- and disaccharides [FA1301]]                                                                                                              |
| 2470 | 0.000113 | -2.75 | 377.160518       | Ph        | C <sub>20</sub> H <sub>26</sub> O <sub>7</sub>                    | 378.167631           | -0.587         | Chaparrinone                                                                                                                                                                                                                         |
| 6583 | 0.022281 | -2.72 | 517.389808       | Lp        | C <sub>32</sub> H <sub>54</sub> O <sub>5</sub>                    | 518.397125           | 0.001          | 7 $\beta$ -acetoxy-gorgostan-3 $\beta$ ,5 $\beta$ ,6 $\beta$ -triol [Gorgosterols and derivatives[ ST0106]]                                                                                                                          |
| 3850 | 0.034607 | -2.45 | 433.114036       | Ph        | C <sub>21</sub> H <sub>22</sub> O <sub>10</sub>                   | 434.121138           | -0.365         | Naringenin 7-O- $\beta$ -D-glucoside; Prunin                                                                                                                                                                                         |
| 168  | 0.003001 | -2.39 | 215.032805       | Cb        | C <sub>5</sub> H <sub>13</sub> O <sub>7</sub> P                   | 216.040068           | 0.832          | 2-C-Methyl-D-erythritol 4-phosphate                                                                                                                                                                                                  |
| 398  | 0.017330 | -2.29 | 252.051365       | Ph        | C <sub>11</sub> H <sub>11</sub> NO <sub>6</sub>                   | 253.058639           | 0.009          | N-Pyruvoyl-5-methoxy-3-hydroxyanthranilate; N-Pyruvoyl-5-methoxy-3-hydroxyanthranilic acid                                                                                                                                           |
| 4275 | 0.010541 | -2.17 | 449.108874       | Ph        | C <sub>21</sub> H <sub>22</sub> O <sub>11</sub>                   | 450.116228           | 0.037          | Neoastilbin; (2S,3S)-Taxifolin 3-rhamnoside                                                                                                                                                                                          |
| 3963 | 0.005772 | -2.03 | 437.436392       | Lp        | C <sub>29</sub> H <sub>58</sub> O <sub>2</sub>                    | 438.443680           | -0.001         | Nonacosanoic acid; nonacosanoic acid [carboxylicacid]                                                                                                                                                                                |
| 9827 | 0.043267 | -2.00 | 659.416826       | Lp        | C <sub>38</sub> H <sub>60</sub> O <sub>9</sub>                    | 660.424359           | 0.949          | 12-O-Palmitoyl-16-hydroxyphorbol 13-acetate; Crotonfactor F1                                                                                                                                                                         |
| 3595 | 0.019732 | -1.86 | 423.420748       | Lp        | C <sub>28</sub> H <sub>56</sub> O <sub>2</sub>                    | 424.428030           | -0.001         | Octacosanoic acid; octacosanoic acid [carboxylicacid]                                                                                                                                                                                |
| 2193 | 0.019086 | -1.70 | 365.064434       | Cb        | C <sub>13</sub> H <sub>19</sub> O <sub>10</sub> P                 | 366.071588           | 0.013          | Salicin 6-phosphate; Salicin-6P                                                                                                                                                                                                      |
| 4370 | 0.021845 | -1.65 | 451.452007       | Lp        | C <sub>30</sub> H <sub>60</sub> O <sub>2</sub>                    | 452.459330           | -0.001         | Melissic acid; triacontanoic acid [Straight chain fatty acids [FA0101]]                                                                                                                                                              |
| 3437 | 0.041210 | -1.65 | 419.098345       | Ph        | C <sub>20</sub> H <sub>20</sub> O <sub>10</sub>                   | 420.105480           | -0.396         | 5,3',5'-Trihydroxy-3,6,7,8,4'-pentamethoxyflavone [Flavones and Flavonols [PK1211]]                                                                                                                                                  |
| 2711 | 0.035887 | -1.38 | 387.129652       | Lp        | C <sub>17</sub> H <sub>24</sub> O <sub>10</sub>                   | 388.136901           | -0.117         | Secologanin; (-)-Secologanin                                                                                                                                                                                                         |
| 1466 | 0.026006 | -1.25 | 333.061614       | Ph        | C <sub>16</sub> H <sub>14</sub> O <sub>8</sub>                    | 334.068821           | -0.137         | 6-Methoxytaxifolin                                                                                                                                                                                                                   |
| 8192 | 0.041414 | -1.24 | 577.135010       | Ph        | C <sub>30</sub> H <sub>26</sub> O <sub>12</sub>                   | 578.142443           | 0.029          | Epicatechin-(4 $\rightarrow$ 8)-ent-epicatechin                                                                                                                                                                                      |
| 1341 | 0.020785 | -1.21 | 327.10854        | Ph        | C <sub>15</sub> H <sub>20</sub> O <sub>8</sub>                    | 328.115820           | 0.008          | Anisatin                                                                                                                                                                                                                             |
| 8092 | 0.034853 | -1.01 | 571.327453       | Lp        | C <sub>33</sub> H <sub>48</sub> O <sub>8</sub>                    | 572.334750           | -0.294         | 6,8a-Seco-6,8a-deoxy-5-oxoavermectin"2b"a glycone                                                                                                                                                                                    |
| 6493 | 0.035506 | -0.93 | 515.192200       | Pp        | C <sub>14</sub> H <sub>33</sub> N <sub>10</sub> O <sub>7</sub> PS | 516.199536           | 0.651          | Phaseolotoxin                                                                                                                                                                                                                        |
| 1699 | 0.009584 | -0.73 | 343.124559       | Cb        | C <sub>12</sub> H <sub>24</sub> O <sub>11</sub>                   | 344.131972           | 0.323          | Melibiotol; 6-O- $\beta$ -D-Galactosyl-D-glucitol                                                                                                                                                                                    |
| 476  | 0.041925 | -0.67 | 263.128880       | Ph        | C <sub>15</sub> H <sub>20</sub> O <sub>4</sub>                    | 264.136160           | 0.005          | Abcisate; Absciscic acid; (+)-Absciscic acid                                                                                                                                                                                         |
| 1291 | 0.025648 | -0.45 | 325.114000       | Cb        | C <sub>12</sub> H <sub>21</sub> O <sub>10</sub> R                 | 326.121300           | 0.010          | R replaced by H in $\beta$ -L-Fucosyl-1,2- $\beta$ -D-galactoside; Glycoprotein $\beta$ -L-fucosyl-(1,2)-D-galactose; Glycolipid $\beta$ -L-fucosyl-1,2- $\beta$ -D-galactose; $\beta$ -L-Fucosyl-(1 $\rightarrow$ 2)-D-galactosyl-R |
| 2044 | 0.034599 | -0.45 | 359.098344       | NM        | C <sub>15</sub> H <sub>20</sub> O <sub>10</sub>                   | 360.105488           | -0.441         | 3-Methoxy-4-hydroxyphenylglycol glucuronide (see KEGG C03033); (2S,3S,4S,5R,6R)-3,4,5-trihydroxy-6-[2-hydroxy-2-(4-hydroxy-3-methoxy-phenyl) ethoxy]oxane-2-carboxylic acid [acetal]                                                 |

|      |          |       |            |    |                                                 |            |        |                                                                                              |
|------|----------|-------|------------|----|-------------------------------------------------|------------|--------|----------------------------------------------------------------------------------------------|
| 4909 | 1.26E-05 | +4.75 | 471.38413  | Lp | C <sub>31</sub> H <sub>52</sub> O <sub>3</sub>  | 472.391300 | -0.732 | Soyasapogenol D                                                                              |
| 5268 | 0.034407 | +0.89 | 481.135032 | Ph | C <sub>22</sub> H <sub>26</sub> O <sub>12</sub> | 482.142070 | -0.739 | Catalposide                                                                                  |
| 5975 | 0.012284 | +0.26 | 501.145887 | Cb | C <sub>18</sub> H <sub>30</sub> O <sub>16</sub> | 502.153390 | 0.011  | β-L-Rhamnopyranosyl-(1->2)-β-D-galactopyranosyl-(1->2)-β-D-glucuronopyranoside; β-Fabatriose |

---

**Supplementary Table S4.** List of fungal species detected in the woody subsamples of vines belonging to the three different conditions analyzed in 2019. *In bold the genera/species associated to GTDs.*

| Fungal species                        | DAT      |          |          |          | DS       |          |          |          | H        |          |          |          |
|---------------------------------------|----------|----------|----------|----------|----------|----------|----------|----------|----------|----------|----------|----------|
|                                       | c        | hw       | iw       | wr       | c        | hw       | iw       | wr       | c        | hw       | iw       | wr       |
| <i>Acremonium alcalophilum</i>        |          |          |          |          |          |          |          |          |          |          | Detected |          |
| <i>Acremonium alternatum</i>          |          | Detected | Detected |          |          |          |          | Detected |          |          | Detected |          |
| <i>Acremonium blochii</i>             |          | Detected | Detected |          |          |          |          |          |          |          |          |          |
| <i>Acremonium furcatum</i>            |          | Detected | Detected |          |          |          |          | Detected |          | Detected |          |          |
| <i>Acremonium sp.</i>                 |          |          | Detected | Detected |          |          |          | Detected |          |          |          |          |
| <i>Acremonium spinosum</i>            |          |          |          | Detected |          |          |          |          |          |          |          |          |
| <i>Acrostagmus luteoalbus</i>         |          |          |          |          |          |          |          |          |          |          | Detected | Detected |
| <i>Agaricus arvensis</i>              |          |          |          | Detected |          |          |          |          |          |          | Detected |          |
| <i>Agrocybe praecox</i>               |          |          |          |          |          |          |          | Detected |          | Detected | Detected |          |
| <i>Ajellomyces crescens</i>           | Detected |          |          |          |          |          |          |          |          |          |          |          |
| <i>Alternaria alternata</i>           | Detected | Detected | Detected |          | Detected | Detected |          |          | Detected | Detected | Detected |          |
| <i>Alternaria atra</i>                |          |          |          |          |          | Detected |          |          |          | Detected |          |          |
| <i>Alternaria solariidae</i>          |          |          |          |          |          |          |          |          |          | Detected |          |          |
| <i>Amycosphaerella africana</i>       |          |          |          |          |          |          |          | Detected |          |          |          |          |
| <i>Antarctomyces psychrotrophicus</i> |          |          |          |          | Detected | Detected |          | Detected |          | Detected | Detected |          |
| <i>Arachnomyces kanei</i>             |          |          |          |          |          |          | Detected |          |          |          |          |          |
| <i>Archaeospora schenckii</i>         |          |          |          |          | Detected |          |          |          |          |          |          |          |
| <i>Armillaria mellea</i>              | Detected |          |          |          |          |          |          |          |          |          |          |          |
| <i>Arthothelium spectabile</i>        |          |          |          | Detected |          |          |          |          |          |          |          |          |
| <i>Articulospora sp.</i>              | Detected |          |          | Detected | Detected |          |          | Detected | Detected |          | Detected |          |
| <i>Ascochyta hordei</i>               |          |          |          | Detected |          |          |          | Detected |          |          |          |          |
| <i>Ascochyta manawaoarae</i>          |          |          |          |          | Detected |          |          |          |          |          |          |          |
| <i>Aspergillus amstelodami</i>        | Detected |          |
| <i>Aspergillus felis</i>              |          |          |          |          | Detected |          |          |          |          |          |          |          |
| <i>Aspergillus halophilicus</i>       |          |          |          |          |          | Detected |          |          |          |          |          |          |
| <i>Aspergillus japonicus</i>          |          |          |          |          | Detected |          |          |          |          |          |          |          |
| <i>Aspergillus penicillioides</i>     | Detected |          |          | Detected |          |          |          | Detected |          | Detected | Detected |          |
| <i>Aspergillus piperis</i>            | Detected | Detected | Detected |          | Detected | Detected | Detected |          | Detected |          |          |          |
| <i>Aspergillus sydowii</i>            | Detected |
| <i>Aspergillus wentii</i>             |          |          |          |          | Detected |          |          |          |          |          |          | Detected |
| <i>Astraeus hygrometricus</i>         |          | Detected |          |          |          |          |          |          |          |          |          |          |
| <i>Athelia pyriformis</i>             |          |          |          | Detected |          |          |          |          |          |          |          |          |
| <i>Aureobasidium pullulans</i>        | Detected |
| <i>Auxarthron alboluteum</i>          |          |          | Detected |          |          |          |          |          |          |          |          |          |
| <i>Auxarthron umbrinum</i>            |          |          |          | Detected |          |          |          |          |          |          |          |          |
| <i>Bacidia chlorotricula</i>          |          | Detected | Detected | Detected |          | Detected |          | Detected |          | Detected | Detected |          |
| <i>Bacidia neosquamulosa</i>          |          |          | Detected | Detected |          |          |          | Detected |          |          | Detected | Detected |
| <i>Bacidina adastrata</i>             |          | Detected | Detected | Detected |          | Detected |          | Detected |          | Detected | Detected | Detected |
| <i>Baeospora myosura</i>              | Detected |          |          |          |          |          |          | Detected |          |          |          |          |
| <i>Basidioascus undulatus</i>         |          |          |          |          | Detected |          |          |          |          |          |          |          |
| <i>Beauveria pseudobassiana</i>       |          |          |          |          |          |          |          |          |          |          |          | Detected |
| <i>Bipolaris eleusines</i>            | Detected |          |          |          |          |          |          |          |          |          |          |          |
| <i>Bisporella subpallida</i>          |          |          |          | Detected |          |          |          |          |          |          |          |          |
| <i>Boeremia exigua</i>                | Detected | Detected | Detected | Detected | Detected |          |          | Detected |          |          | Detected | Detected |
| <b>Botryosphaeria dothidea</b>        | Detected |          |          |          |          |          |          |          |          |          |          |          |
| <b>Botryotinia fuckeliana</b>         | Detected | Detected | Detected | Detected | Detected |          | Detected | Detected | Detected | Detected | Detected | Detected |
| <i>Brachyphoris oviparasitica</i>     |          |          |          |          | Detected |          |          |          |          |          |          |          |
| <i>Bradomyces alpinus</i>             |          |          |          |          |          |          |          |          |          | Detected |          |          |
| <i>Brettanomyces bruxellensis</i>     |          |          |          |          |          |          |          | Detected |          |          |          |          |
| <i>Brevicellicium olivascens</i>      |          |          |          | Detected |          |          |          |          |          |          |          |          |
| <b>Cadophora luteo-olivacea</b>       |          | Detected | Detected | Detected |          | Detected |          | Detected |          |          | Detected | Detected |
| <b>Cadophora melinii</b>              |          |          | Detected |          |          |          |          |          |          |          |          |          |
| <b>Cadophora sp.</b>                  |          |          | Detected |          |          |          |          |          |          |          |          |          |
| <i>Calcarisporiella thermophila</i>   |          | Detected | Detected |          | Detected |          |
| <i>Calocera cornea</i>                |          |          |          | Detected |          |          |          |          |          |          |          |          |
| <i>Caloplaca obscurella</i>           |          |          |          |          |          |          |          | Detected |          |          |          |          |
| <i>Calycina claroflava</i>            |          |          |          | Detected |          |          |          | Detected |          | Detected |          | Detected |
| <i>Camarosporium sp.</i>              |          |          |          |          |          |          |          | Detected |          |          |          |          |
| <i>Candida orthopsilosis</i>          |          |          |          |          |          |          |          |          |          | Detected |          |          |

|                                     |          |          |          |          |          |          |          |          |          |          |          |          |          |
|-------------------------------------|----------|----------|----------|----------|----------|----------|----------|----------|----------|----------|----------|----------|----------|
| <i>Candida parapsilosis</i>         | Detected |          |          |          |          |          |          |          |          | Detected |          |          |          |
| <i>Candida subhashii</i>            |          | Detected |          |          |          | Detected |          |          |          |          |          |          |          |
| <i>Candida zeylanoides</i>          |          |          | Detected |          |          |          |          |          |          |          |          |          |          |
| <i>Capnobotryella</i> sp.           |          | Detected |          |          |          |          |          |          | Detected |          |          |          |          |
| <i>Capronia pilosella</i>           |          |          | Detected | Detected |          |          | Detected |          | Detected |          |          | Detected | Detected |
| <i>Capronia semi-immersa</i>        |          |          | Detected | Detected |          |          |          |          | Detected |          |          |          | Detected |
| <i>Capronia</i> sp.                 | Detected |          | Detected | Detected |          |          | Detected | Detected |          | Detected |          |          |          |
| <i>Cephalosporium serrae</i>        |          | Detected |          |          | Detected |          | Detected | Detected |          |          |          |          |          |
| <i>Ceratocystis</i> sp.             |          |          | Detected |          |          |          |          |          |          |          |          | Detected |          |
| <i>Cercospora apii</i>              |          | Detected |          |          |          |          |          |          |          |          |          |          |          |
| <i>Chaetomium iraniamum</i>         | Detected |          | Detected |          |          |          |          |          |          |          |          | Detected |          |
| <i>Chaetomium</i> sp.               | Detected |          |          |          |          |          |          |          | Detected |          |          |          |          |
| <i>Chaetosphaeria myriocarpa</i>    |          |          | Detected |          |          |          |          |          |          |          |          |          |          |
| <i>Chaetosphaeria</i> sp.           |          |          | Detected |          |          |          |          |          |          |          |          |          |          |
| <i>Chalastospora ellipsoidea</i>    | Detected |          |          |          | Detected |          | Detected |          |          | Detected |          |          | Detected |
| <i>Chalastospora obclavata</i>      | Detected |          |          |          | Detected |          |          |          | Detected |          |          | Detected | Detected |
| <i>Chrysosporium lobatum</i>        |          |          | Detected |          |          |          |          |          |          |          | Detected |          |          |
| <i>Chrysosporium pilosum</i>        | Detected |          | Detected |          |          |          |          | Detected |          |          | Detected | Detected | Detected |
| <i>Chrysosporium</i> sp.            | Detected |          |          |          |          |          |          | Detected |          |          | Detected |          |          |
| <i>Cistella</i> sp.                 |          |          | Detected |          |          |          |          |          |          |          |          |          |          |
| <i>Cladophialophora chaetospora</i> |          |          |          |          |          |          |          |          |          |          |          | Detected |          |
| <i>Cladophialophora</i> sp.         |          |          | Detected | Detected |          |          | Detected | Detected | Detected | Detected | Detected |          |          |
| <i>Cladosporium halotolerans</i>    |          |          |          |          |          |          |          | Detected |          |          |          | Detected | Detected |
| <i>Cladosporium herbarum</i>        | Detected | Detected | Detected | Detected |          |          | Detected |
| <i>Cladosporium ramotenellum</i>    | Detected | Detected | Detected |          |          |          | Detected | Detected |          | Detected |          |          | Detected |
| <i>Cladosporium sphaerospermum</i>  |          | Detected | Detected | Detected |          |          |          | Detected |          |          | Detected | Detected |          |
| <i>Clavaria californica</i>         |          |          |          |          |          |          |          |          |          |          |          |          |          |
| <i>Claviceps</i> sp.                | Detected | Detected | Detected | Detected |          |          |          |          |          | Detected |          | Detected | Detected |
| <i>Clitocybe rivulosa</i>           |          | Detected |          |          |          |          |          |          |          |          |          |          |          |
| <i>Clitopilus hobsonii</i>          |          |          |          |          |          |          |          |          |          |          |          | Detected |          |
| <i>Clonostachys rosea</i>           |          |          | Detected |          |          |          |          |          |          |          |          | Detected |          |
| <i>Cochliobolus geniculatus</i>     |          |          |          |          |          |          | Detected |          |          |          |          |          |          |
| <i>Coniolariaella hispanica</i>     |          | Detected |          | Detected |          |          |          | Detected |          | Detected |          |          |          |
| <i>Coniosporium</i> sp.             |          |          |          |          |          |          |          |          | Detected |          |          |          |          |
| <i>Coniothyrium sidae</i>           |          | Detected | Detected |          |          |          | Detected |          |          | Detected |          | Detected |          |
| <i>Conocybe</i> sp.                 |          |          |          |          | Detected |          |          |          |          |          |          |          |          |
| <i>Coprinellus micaceus</i>         | Detected |          |          |          |          |          |          |          |          |          |          |          |          |
| <i>Coprinellus radians</i>          | Detected |          |          |          |          |          |          |          |          |          |          | Detected |          |
| <i>Coprinellus sabulicola</i>       | Detected |          | Detected |          |          |          |          | Detected |          |          |          |          |          |
| <i>Coprinellus</i> sp.              |          |          |          |          |          |          |          |          |          |          |          | Detected |          |
| <i>Cortinarius</i> sp.              | Detected | Detected |          |          |          |          | Detected |          | Detected | Detected | Detected | Detected |          |
| <i>Corynespora smithii</i>          |          | Detected |          | Detected |          |          |          | Detected |          | Detected |          | Detected | Detected |
| <i>Cosmospora</i> sp.               |          | Detected | Detected | Detected |          |          |          | Detected |          | Detected |          | Detected | Detected |
| <i>Crocicreas</i> sp.               |          |          |          |          | Detected |          |          |          |          |          |          |          |          |
| <i>Cryptococcus adeliensis</i>      | Detected |          |          |          |          |          | Detected | Detected | Detected |          |          | Detected |          |
| <i>Cryptococcus aerius</i>          | Detected | Detected | Detected | Detected |          |          | Detected | Detected | Detected | Detected |          |          |          |
| <i>Cryptococcus bhutanensis</i>     | Detected | Detected | Detected |          |          |          |          |          |          |          |          |          |          |
| <i>Cryptococcus cerealis</i>        |          |          |          |          |          |          |          |          |          |          |          |          |          |
| <i>Cryptococcus chernovii</i>       | Detected | Detected |          | Detected |          |          | Detected | Detected |          | Detected |          | Detected | Detected |
| <i>Cryptococcus diffluens</i>       | Detected | Detected | Detected |          |          |          | Detected | Detected |          | Detected |          |          |          |
| <i>Cryptococcus dimennae</i>        |          |          | Detected | Detected |          |          |          |          |          | Detected |          |          |          |
| <i>Cryptococcus friedmannii</i>     | Detected | Detected |          |          |          |          |          |          |          |          |          |          |          |
| <i>Cryptococcus heimaeyensis</i>    | Detected |          |          |          |          |          |          |          |          |          |          |          |          |
| <i>Cryptococcus laurentii</i>       |          | Detected | Detected | Detected |          |          | Detected |          |          | Detected |          |          |          |
| <i>Cryptococcus magnus</i>          | Detected | Detected | Detected |          |          |          | Detected |          | Detected |          | Detected | Detected |          |
| <i>Cryptococcus oeirensis</i>       | Detected |          |          |          |          |          | Detected |          |          |          |          |          |          |
| <i>Cryptococcus phenolicus</i>      |          | Detected | Detected | Detected |          |          | Detected | Detected |          |          | Detected | Detected | Detected |
| <i>Cryptococcus podzolicus</i>      | Detected |          |          |          |          |          |          | Detected |          |          | Detected |          |          |
| <i>Cryptococcus saitoi</i>          |          |          |          |          |          |          |          |          |          |          |          |          | Detected |
| <i>Cryptococcus</i> sp.             | Detected | Detected | Detected | Detected |          |          | Detected | Detected |          | Detected |          | Detected | Detected |
| <i>Cryptococcus terreus</i>         | Detected | Detected | Detected |          |          |          | Detected | Detected |          |          |          |          |          |
| <i>Cryptococcus terricola</i>       | Detected |          |          |          |          |          |          | Detected |          |          |          |          |          |
| <i>Cryptococcus victoriae</i>       | Detected | Detected | Detected | Detected |          |          | Detected |          | Detected | Detected |          |          |          |
| <i>Cryptococcus wieringae</i>       |          |          |          |          |          |          |          |          |          |          |          | Detected |          |
| <i>Cryptodiscus rhopaloides</i>     |          |          |          |          | Detected |          |          |          |          | Detected |          |          | Detected |
| <i>Cryptosporiopsis actinidiae</i>  |          |          |          |          | Detected |          |          |          |          | Detected |          | Detected |          |
| <i>Curreya austroafricana</i>       |          | Detected | Detected | Detected |          |          |          | Detected |          | Detected |          | Detected |          |
| <i>Curvibasidium cygneicollum</i>   |          |          |          |          |          |          |          |          |          | Detected |          |          |          |

[illegible]









**Supplementary Table S5:** Grape juices enological parameters obtained from the analysis of two distinct grape juices from five distinct vine trunks, for each of the three vine conditions (only 4 vine trunks for the H condition).

| Sample | pH <sup>a</sup> |      | $\alpha$ -amino Nitrogen <sup>b</sup><br>(mg/L) |     | Ammoniacal<br>Nitrogen <sup>a</sup> (mg/L) |      | TA <sup>a</sup> (g/L Sulfuric acid) |      | Sugars <sup>a</sup> (g/L) |     |
|--------|-----------------|------|-------------------------------------------------|-----|--------------------------------------------|------|-------------------------------------|------|---------------------------|-----|
|        | Average         | STD  | Average                                         | STD | Average                                    | STD  | Average                             | STD  | Average                   | STD |
| DS1    | 2.74            | 0.06 | 90                                              | 15  | 99.55                                      | 0.05 | 8.7                                 | 0.7  | 100                       | 12  |
| DS2    | 2.91            | 0.01 | 84                                              | 5   | 85                                         | 3    | 7.9                                 | 0.1  | 169                       | 4   |
| DS3    | 2.83            | 0.03 | 93                                              | 7   | 86                                         | 6    | 9.1                                 | 0.1  | 133                       | 2   |
| DS4    | 2.94            | 0.00 | 241                                             | 17  | 361                                        | 11   | 11.7                                | 0.4  | 56                        | 3   |
| DS5    | 2.81            | 0.10 | 55                                              | 1   | 82                                         | 3    | 7.4                                 | 0.5  | 155                       | 14  |
| DAT1   | 2.85            | 0.03 | 61                                              | 2   | 74                                         | 2    | 6.07                                | 0.18 | 167                       | 6   |
| DAT2   | 2.83            | 0.01 | 79                                              | 5   | 123                                        | 7    | 6.69                                | 0.12 | 156                       | 3   |
| DAT3   | 2.87            | 0.01 | 78.2                                            | 0   | 93                                         | 2    | 6.6                                 | 0.1  | 171                       | 3   |
| DAT4   | 2.95            | 0.01 | 46                                              | 9   | 45                                         | 2    | 6.96                                | 0.09 | 145.1                     | 3.0 |
| DAT5   | 2.82            | 0.04 | 81                                              | 7   | 82                                         | 6    | 6.9                                 | 0.3  | 164                       | 9   |
| H1     | 2.98            | 0.01 | 68                                              | 4   | 66.9                                       | 0.9  | 7.6                                 | 0.1  | 176                       | 3   |
| H2     | 3.06            | 0.03 | 210                                             | 29  | 237.1                                      | 0.5  | 6.5                                 | 0.0  | 178                       | 2   |
| H3     | 2.93            | 0.01 | 95                                              | 9   | 88                                         | 5    | 7.54                                | 0.05 | 175.1                     | 1.8 |
| H5     | 2.99            | 0.02 | 19                                              | 3   | 45                                         | 0.4  | 7.0                                 | 0.1  | 154                       | 5   |

a. FTIR : Fourier Transformed Infra Red; b. enzymatic kit ; TA :total Acidity ; STD : Standard Deviation
